# Supplementary material for: Evidence for a Direct Harmful Effect of Alcohol on Myocardial Health: A Large Cross‐Sectional Study of Consumption Patterns and Cardiovascular Disease Risk Biomarkers From Northwest Russia, 2015 to 2017
Source: PubMed Central journal article supplement (PMC6988140; doi:10.1161/jaha.119.014491), 2019-12-18

# **SUPPLEMENTAL MATERIAL**

**Table S1. Association of high values of hs-cTrT (above 9.34 ng/L) with levels of alcohol use (logistic regression analysis).**

|                                                 | Model 1<br>(adjusted for age and sex),<br>OR (95% CI) | Model 2<br>(additionally adjusted for<br>smoking and education), OR<br>(95% CI) | Model 3<br>(additionally adjusted for<br>other covariates), OR (95%<br>CI) |
|-------------------------------------------------|-------------------------------------------------------|---------------------------------------------------------------------------------|----------------------------------------------------------------------------|
| <b>hsTrT, N = 2595.</b>                         |                                                       |                                                                                 |                                                                            |
| <b>Alcohol use</b>                              |                                                       |                                                                                 |                                                                            |
| Narcology clinic subsample                      | 1.72 (1.22, 2.44)                                     | 2.01 (1.36, 2.97)                                                               | 2.25 (1.5, 3.39)                                                           |
| General population sample, harmful drinkers     | 0.38 (0.17, 0.84)                                     | 0.46 (0.2, 1.03)                                                                | 0.48 (0.21, 1.1)                                                           |
| General population sample, hazardous drinkers   | 0.91 (0.68, 1.23)                                     | 0.92 (0.68, 1.25)                                                               | 0.92 (0.67, 1.26)                                                          |
| General population sample, non-problem drinking | 1.0 [reference group]                                 | 1.0 [reference group]                                                           | 1.0 [reference group]                                                      |
| General population sample, non-drinkers         | 1.03 (0.72, 1.47)                                     | 0.99 (0.69, 1.43)                                                               | 0.89 (0.61, 1.3)                                                           |
| P-value for trend test (among drinkers), df=1   | 0.132                                                 | 0.0734                                                                          | 0.032                                                                      |
| P-value for heterogeneity test, df=4            | < 0.001                                               | < 0.001                                                                         | < 0.001                                                                    |

**Figure S1. The directed acyclic graph (DAG) depicting the suggested causal relationship between heavy alcohol use and heart damage (hs-cTrT serving as a biomarker).**

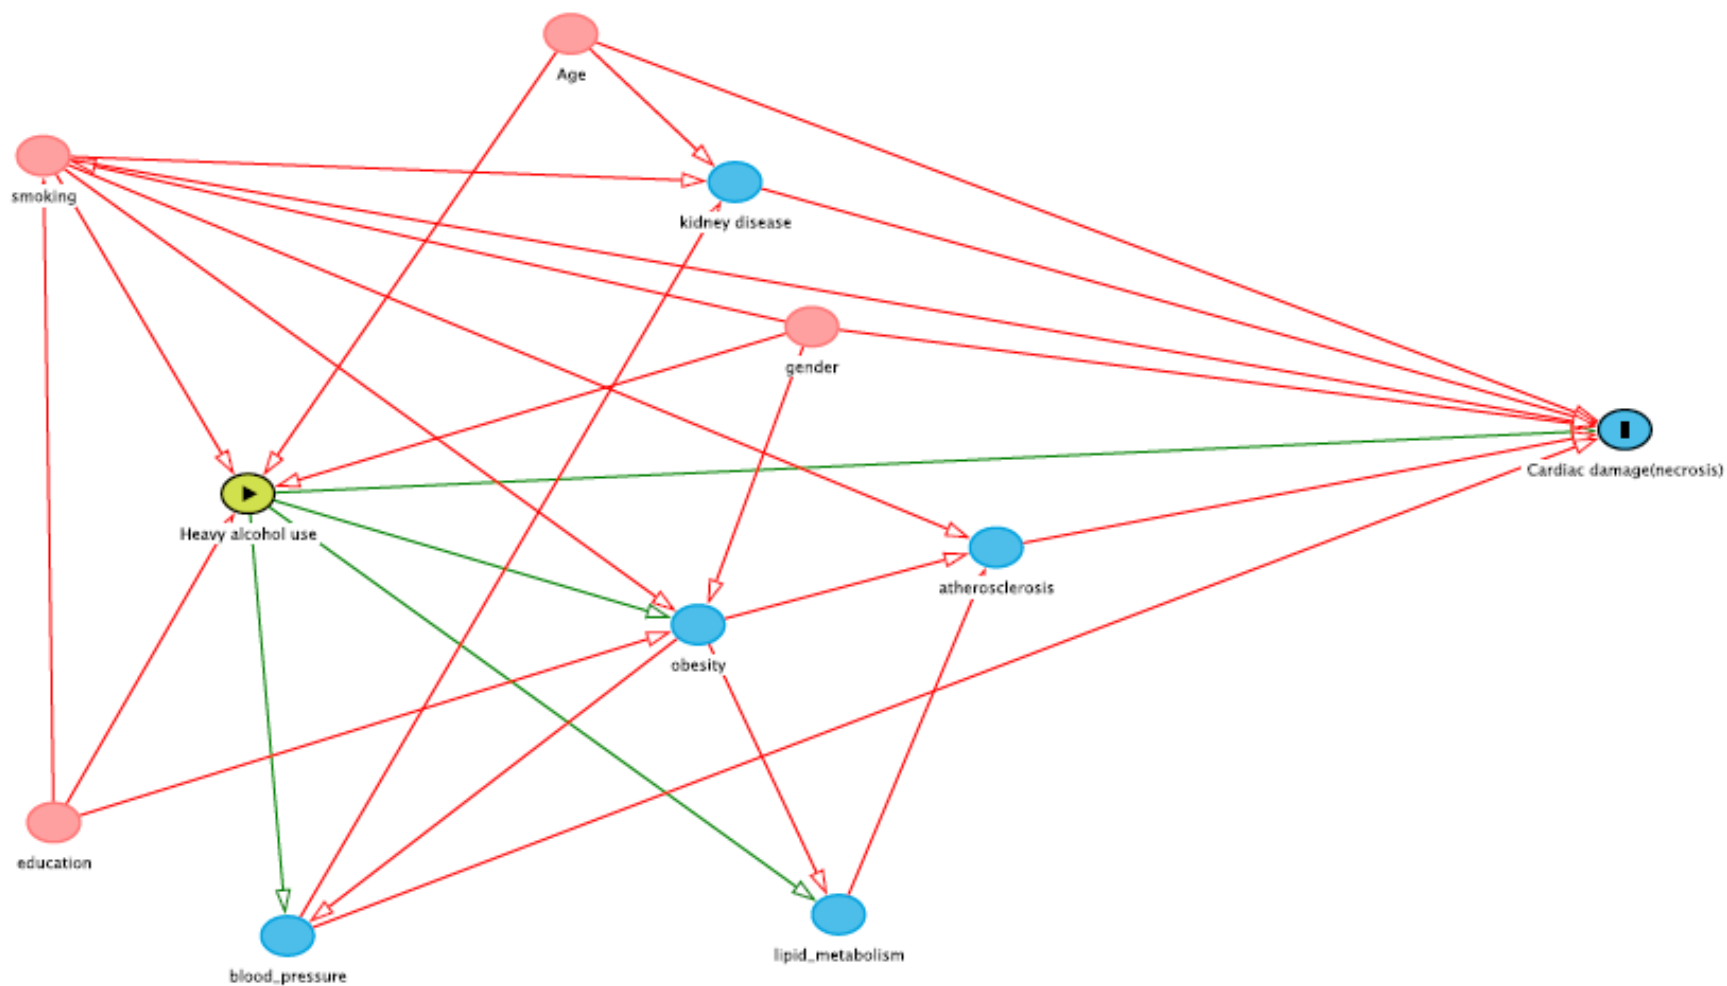

**Figure S2. The directed acyclic graph (DAG) depicting the suggested causal relationship between heavy alcohol use and cardiac wall stretch (NT-proBNP serving as a biomarker).**

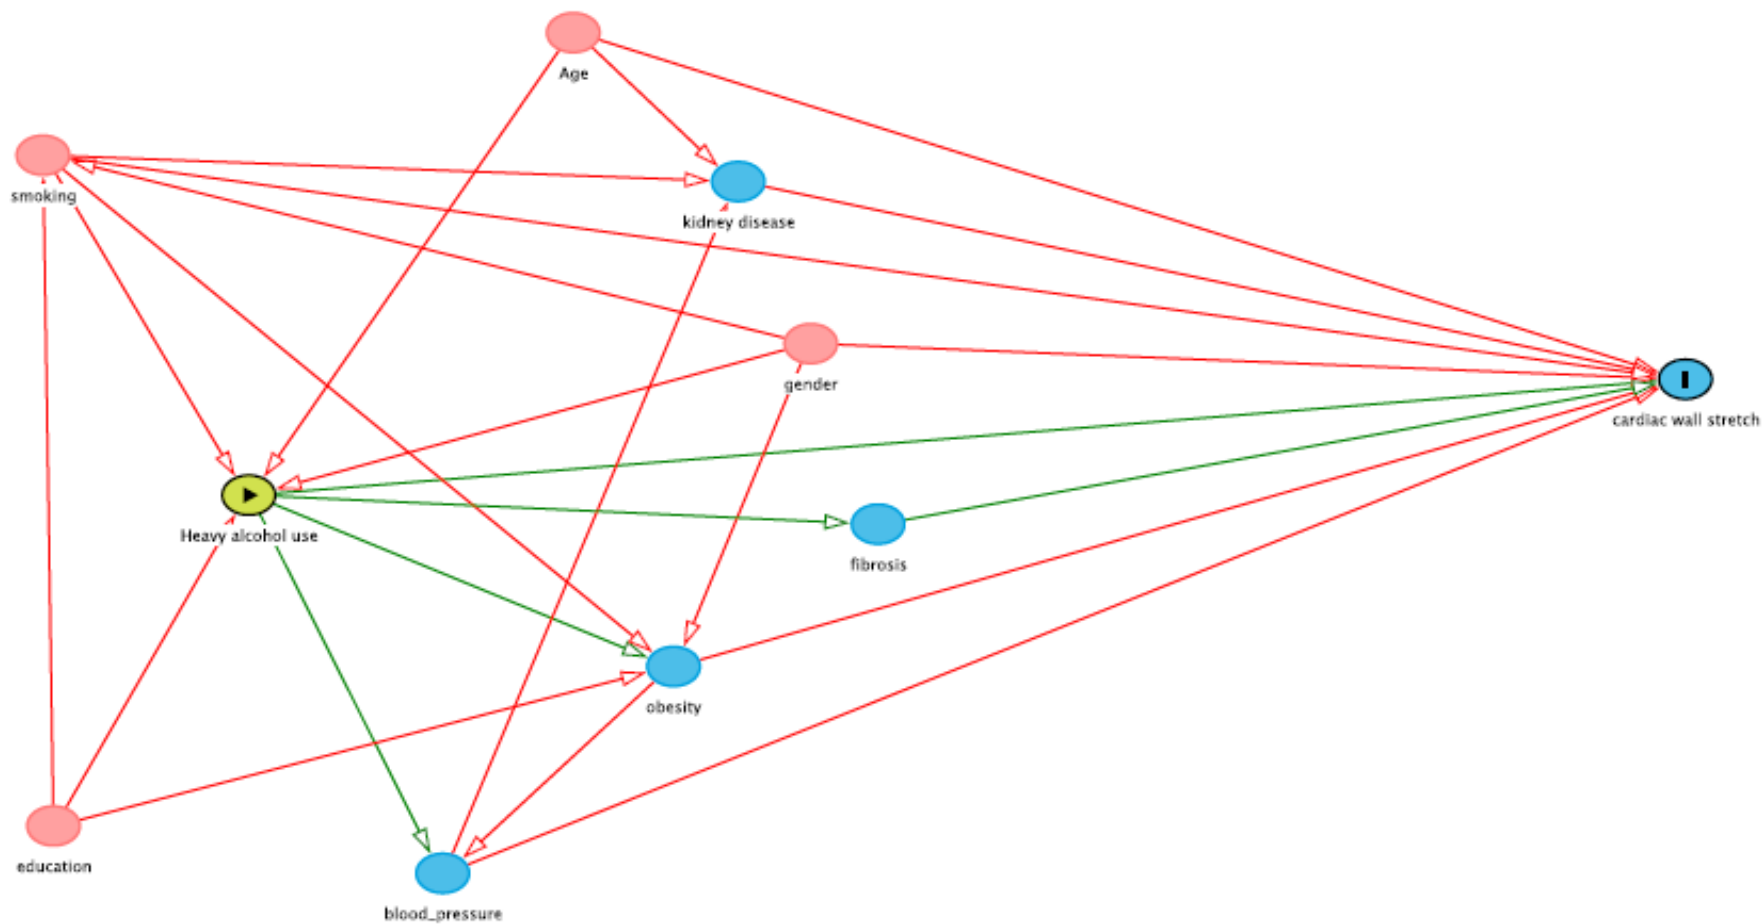

**Figure S3. The directed acyclic graph (DAG) depicting the suggested causal relationship between heavy alcohol use and systemic inflammation (hsCRP serving as a biomarker).**

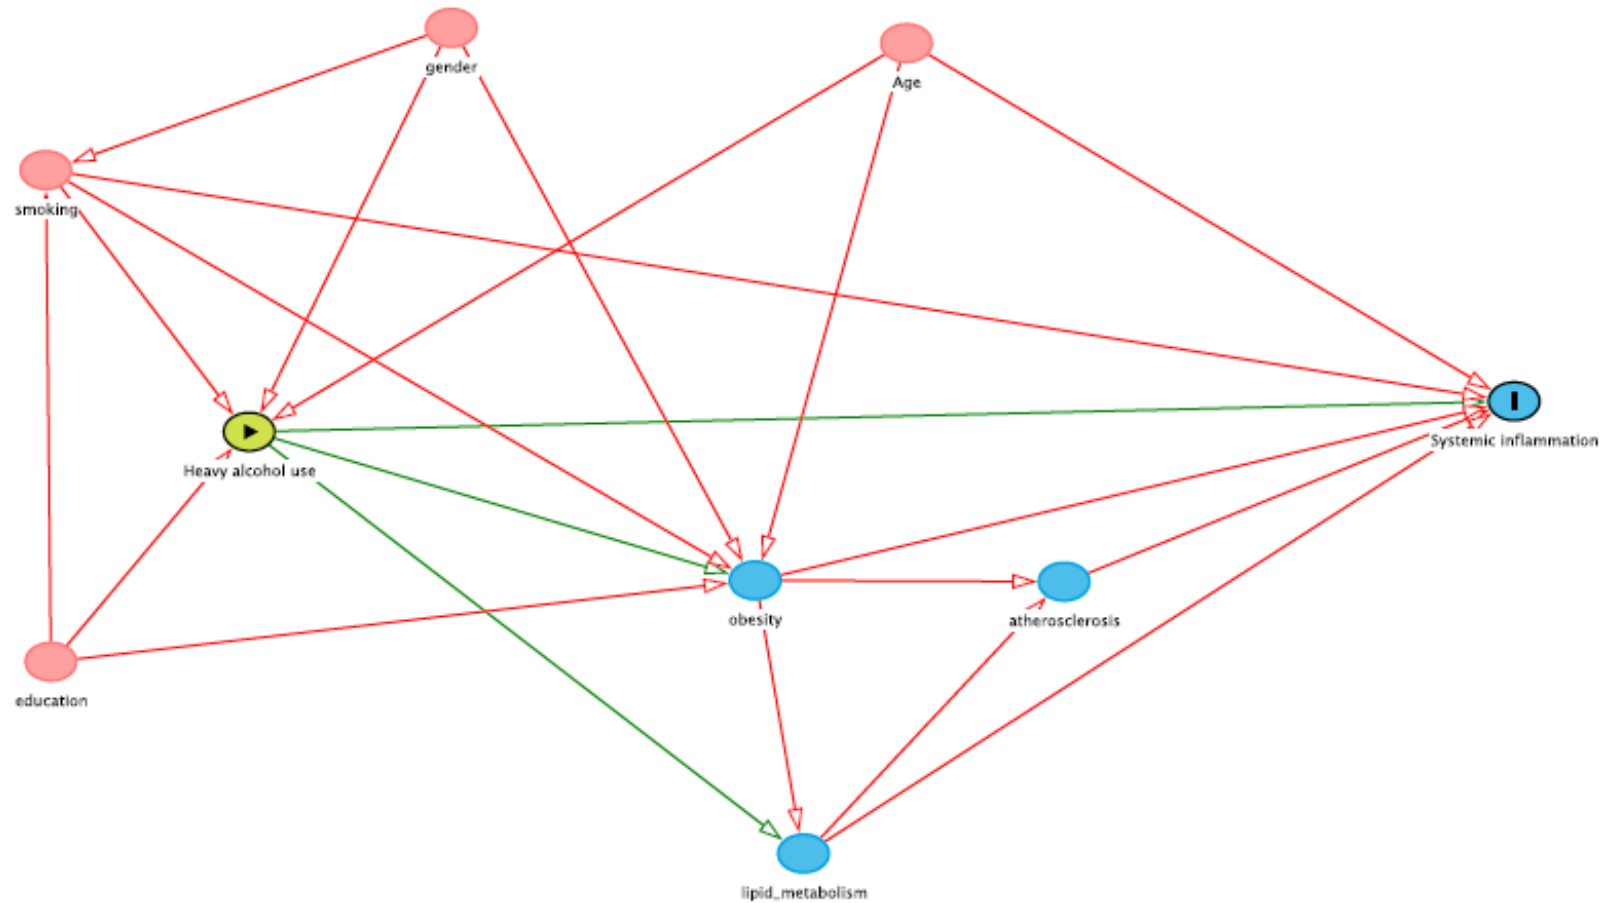

Supplement: JAH3-9-e014491-s001.pdf [file JAH3-9-e014491-s001.pdf]
